# Supplementary material
Source: PubMed Central journal article supplement (PMC8133377)
Supplement: NIHMS1697063-supplement-Supplemental_1.pdf [file NIHMS1697063-supplement-Supplemental_1.pdf]

## Supporting Information

### **Porcine Vocal Fold Lamina Propria-Derived Biomaterials Modulates TGF- $\beta$ 1 Mediated Fibroblast Activation In vitro**

*Camilo Mora-Navarro<sup>†,‡</sup>, Andreea Badileanu<sup>†,‡</sup>, Ana M. Gracioso Martins<sup>†,‡</sup>, Emily W. Ozpinar<sup>†,‡</sup>, Lewis Gaffney<sup>†,‡</sup>, Ian Huntress<sup>§</sup>, Erin Harrell<sup>§</sup>, Jeffrey R. Enders<sup>⊥</sup>, Xinxia Peng<sup>§, #</sup>, Ryan C. Branski<sup>||</sup>, and Donald O. Freytes<sup>†,‡, \*</sup>*

**Equations S1-S3**  
**Proteomics Method S1**  
**Figures S1-S4**  
**Tables S1-S2**  
**References**

**Equation S1** *Normalized absorbance*<sub>405 nm</sub> =  $\frac{A_x - A_0}{A_{MAX} - A_0}$

A is the absorbance value read at that time point. Meanwhile, A<sub>x</sub> refers to any time point, A<sub>0</sub> the minimum absorbance measured. A<sub>MAX</sub> is the maximum absorbance read.

**Equation S2**  $|\eta^*| = kf^n$  ;

**Equation S3**  $\text{Log}|\eta^*| = n\text{Log}f + \text{Log}k$  <sup>1</sup>

## Proteomics Method S1

The digested ECM and resulting suspensions were vortexed and sonicated for 1 min at 20% amplitude on a Fisher Scientific Sonic Dismembrator, Model 120. Samples were spun down at 12,000 x g-force for 15 minutes. Protein quantitation was performed on the supernatant of these spins using a Pierce bicinchoninic acid (BCA) protein assay kit. The amount of protein in each sample was adjusted using 5% sodium deoxycolate (SDC) solution in 50 mM ammonium bicarbonate such that the final amount of protein was 20 µg in 200 µL (i.e., 0.1 µg µL<sup>-1</sup>). Dithiothreitol (DTT) was added to each sample to make a final concentration of 5 mM and then incubated at 60 °C for 30 minutes in order to reduce disulfide bonds. Following the reduction, samples were cooled to room temperature and iodoacetamide (IAM) was added to a final concentration of 15 mM and incubated in the dark for 20 minutes at room temperature. Samples were then washed twice with 50mM ammonium bicarbonate buffer containing 8 M urea using Sartorius Vivacon 500 spin filters with a 30 kDa molecular cutoff weight spun at 12,000 x g-force. Eluent from this step was discarded (proteins remain above the spin filter). Samples were then washed twice with 50 mM ammonium bicarbonate using the same conditions as previously; the eluent was discarded. The waste collection tube below the spin filter was replaced with a fresh tube. Tryptic digestion was achieved by hydrating lyophilized trypsin to a stock solution of 0.1 µg µL<sup>-1</sup> with 0.01 %v/v acetic acid in water. The trypsin solution was added to the protein mixture (i.e. 20 µg protein) in a 1:50 ratio (~0.4 µg trypsin), and then incubated at 37 °C for 4 hours with shaking. Samples were then spun at 12,000 x g-force. At this stage, proteins had been digested into lower molecular weight peptides which could pass through the filter into the collection tube. Samples were next acidified with 6 M HCl to a final concentration of 250 mM (pH ≤ 3).

Figure S1

i.

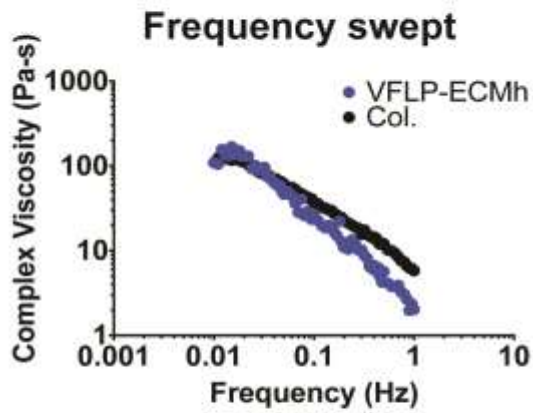

ii.

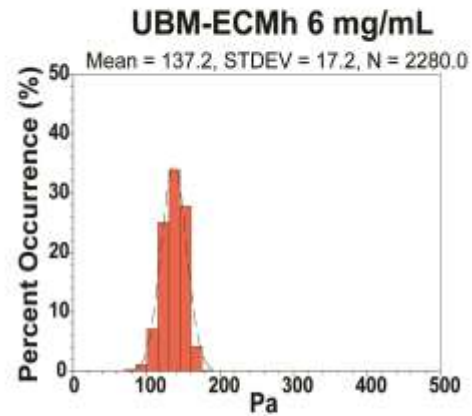

iii.

**Live/Dead assay**

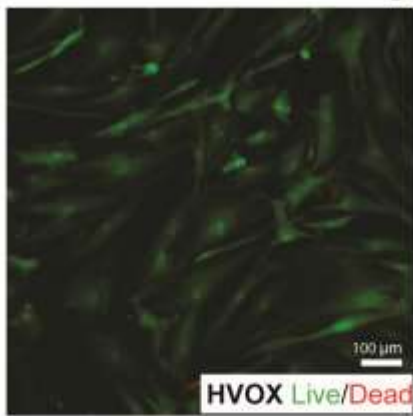

iv.

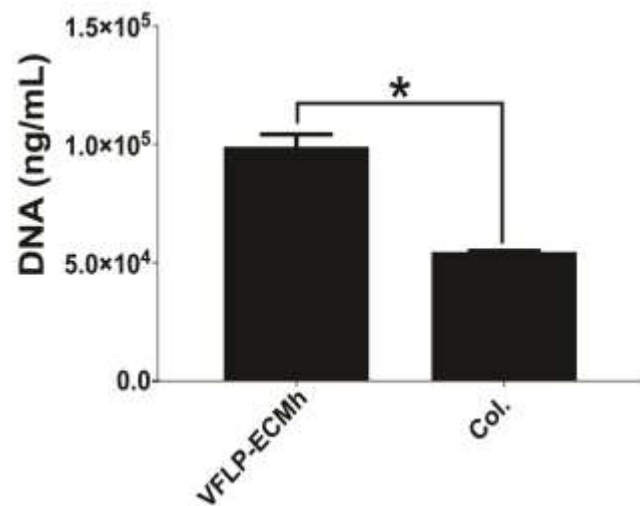

i. Complex viscosity behavior of VFLP-ECMh compared to Collagen Type I at 6 mg/mL. ii. Local surface modulus of the UBM-ECMh. iii. Live/Dead assay staining for HVOX growing on VFLP-ECMh: Calcein AM (live signal, green), ethidium homodimer-1 (dead signal, red). iv. dsDNA quantification for HVOX cultured on VFLP-ECMh or Col.

**Figure S2 i)** Scatterplot comparing gene expression changes in HVOX cells cultured on VFLP-ECMh\* and TCP\* vs. cells cultured on TCP\* and TCP ii) **Scatterplot of global gene expression** changes induced in HVOX vs. HDFn by the VFLP-ECMh. iii) **Heat map** with the same annotated TGF- $\beta$ 1 targeted genes used in Figure 3A. to evaluate similarities in gene expression between HDFn and HVOX upon the three different treatment conditions. The “\*” symbol next to the material represents TGF- $\beta$ 1 treatment.

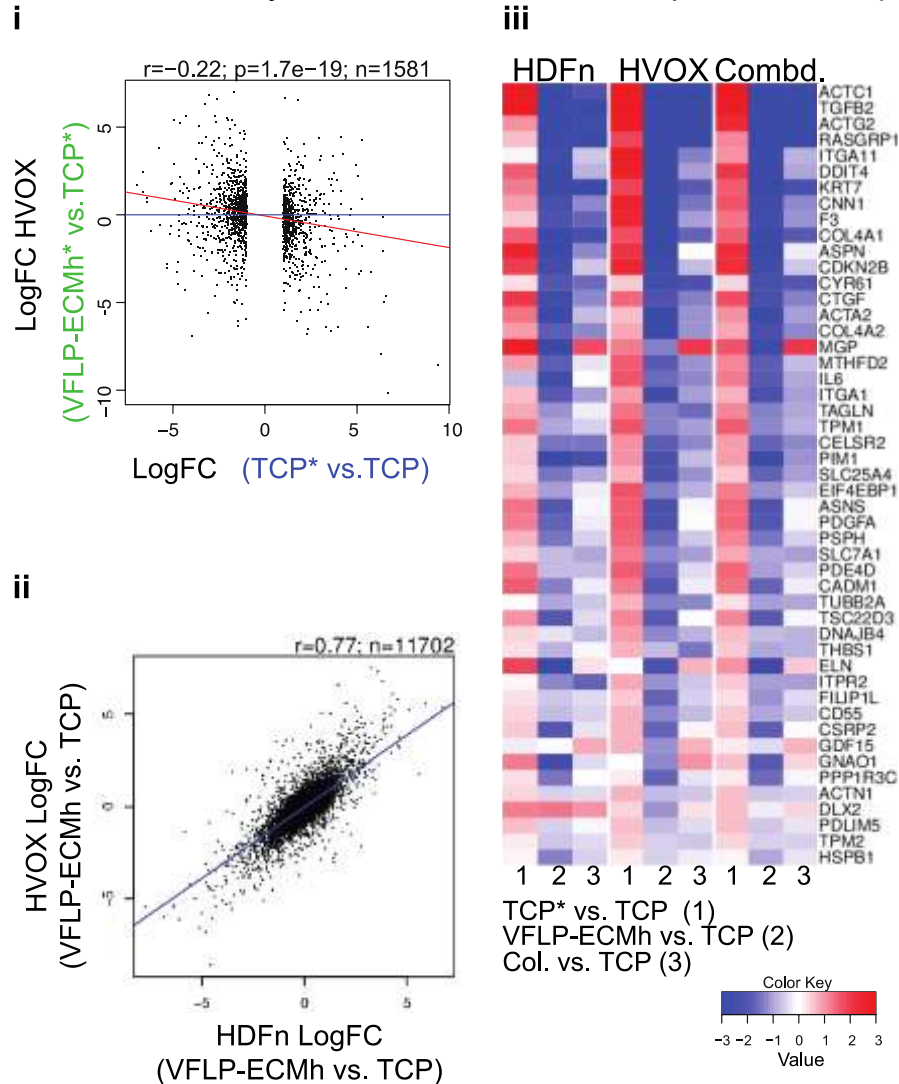

i) X-axis: log2 fold changes in gene expressions in HVOX grown on TCP\* compared to cells on TCP only. Y-axis: log2 fold changes in gene expressions in cells cultured on VFLP-ECMh\* compared to cells on TCP\*. Only the genes that showed a significant difference between TCP\* and TCP were considered for the plot. The blue line reference indicates no gene expression difference between cells in VFLP-ECMh\* and cells on TCP\*. The red line represents a regression line across the genes shown.  $r$  and  $p$ : test of association between these paired log2 fold changes using Pearson's product moment correlation coefficient implemented in R's function 'cor.test'. ii) the scatter plot represents a comparable shift in the genes upon culture on VFLP-ECMh in reference to TCP for HVOX vs. HDFn. iii) Heatmap shows a subset of genes manually selected from those genes that: 1) were significantly upregulated in HVOX grown on TCP\*; 2) exhibited significant difference between VFLP-ECMh\* vs. TCP\* (Green); 3) predicted TGF- $\beta$ 1 targets; 4) were downregulated by VFLP-ECMh on both HVOX and human dermal fibroblast HDFn

**Figure S3 Fibroblast stimulation to myofibroblast using  $\alpha$ -SMA as a marker.**

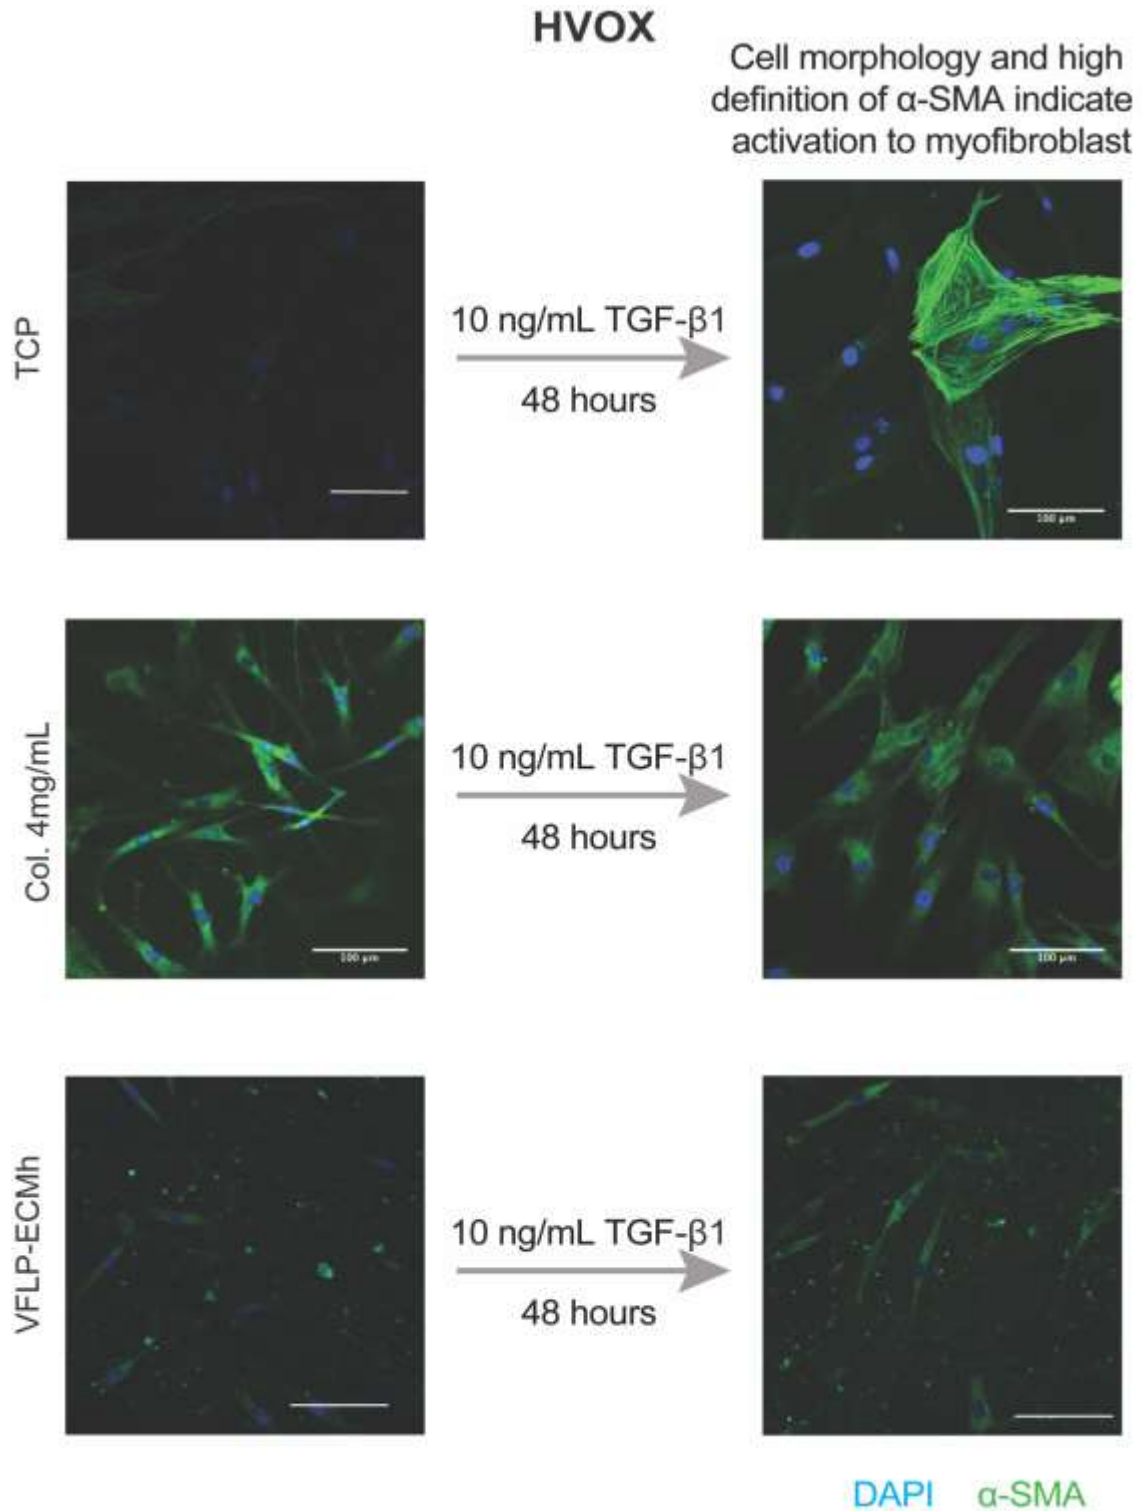

The images were processed as described in the method section.

Figure S4 Gene association (GeneMania) TGF-β1 physical interaction report

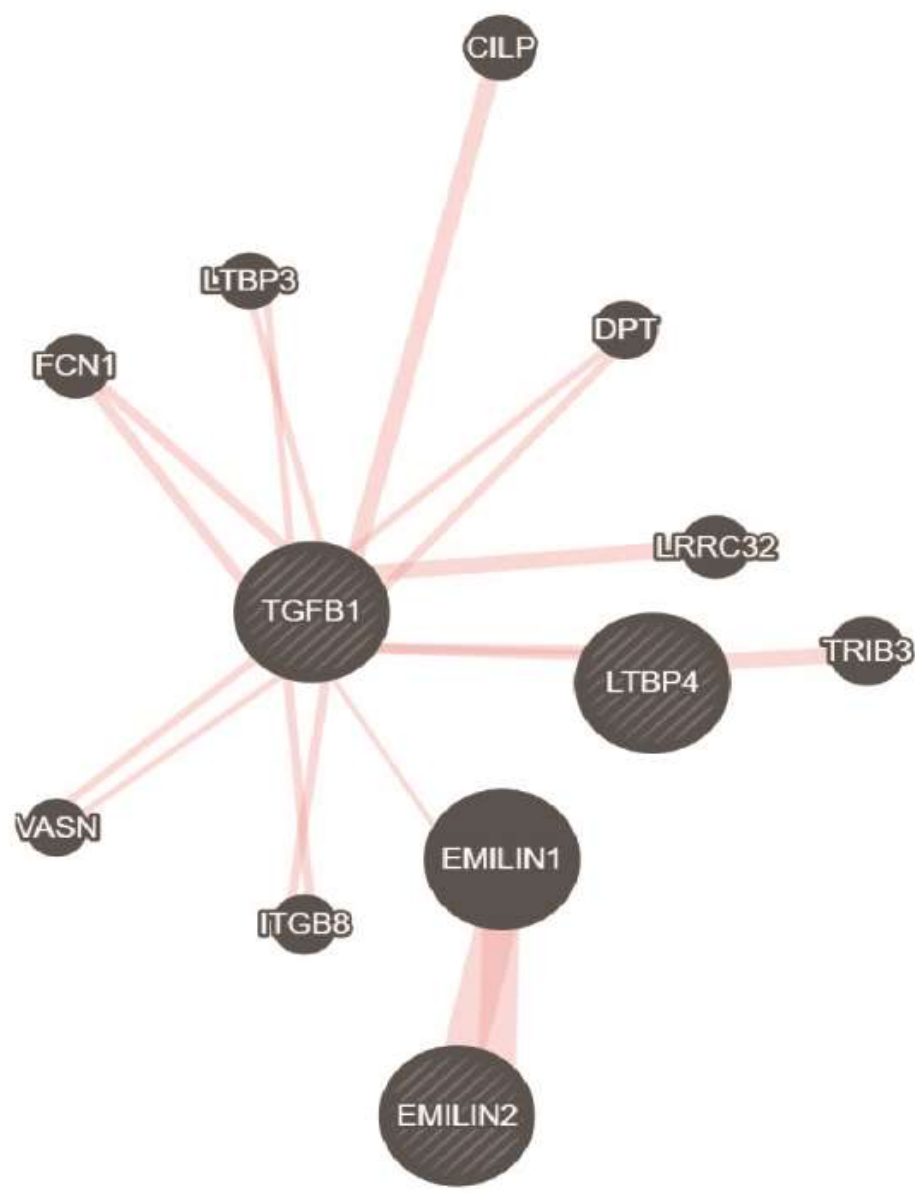

**Table S1** List of primer sequences used for real-time quantitative polymerase chain reaction RT-qPCR.

|               |         |                        |
|---------------|---------|------------------------|
| <i>ACTA2</i>  | Forward | GTGTTGCCCCTGAAGAGCAT   |
|               | Reverse | GCTGGGACATTGAAAGTCTCA  |
| <i>COL1A1</i> | Forward | GTGCGATGACGTGATCTGTGA  |
|               | Reverse | CGGTGGTTTCTTGGTCGGT    |
| <i>GAPDH</i>  | Forward | AAGGTGAAGGTCGGAGTCAAC  |
|               | Reverse | GGGGTCATTGATGGCAACAATA |

**Table S2** Analysis of complex viscosity and comparison with other hydrogels injected in the Vocal Folds

| <b>Material</b>      | <b><i>k</i></b> | <b><i>n</i></b> | <b><i>r</i><sup>2</sup></b> | <b><i>Frequency range (Hz)</i></b> | <b><i>Reference</i></b> |
|----------------------|-----------------|-----------------|-----------------------------|------------------------------------|-------------------------|
| VFLP-ECMh            | 2.565           | - 0.982         | 0.984                       | 0.01-1                             | Figure S1.i             |
| Col.                 | 7.069           | - 0.703         | 0.991                       | 0.01-1                             | Figure S1 i             |
| UBM-ECMh 6 mg/mL     | 5.69            | -0.955          | 0.999                       | 0.01-15                            | <sup>2</sup>            |
| Cymetra®             | 19.9            | -0.778          | 0.972                       | 0.01-100                           | <sup>2</sup>            |
| Zyderm™              | 12              | -0.860          | 0.977                       | 0.01-100                           | <sup>2</sup>            |
| Hyaluronic acid-DTPH | 3.19            | -0.744          | 0.974                       | 0.01–100                           | <sup>2</sup>            |

Values were calculated using the data from the plot shown in Figure S1 and by applying the data to Equation S2 and Equation S3.

## References:

1. Chan, R. W.; Titze, I. R., Viscosities of Implantable Biomaterials in Vocal Fold Augmentation Surgery. *The Laryngoscope* **1998**, *108* (5), 725-731. DOI: 10.1097/00005537-199805000-00019.
2. Freytes, D. O.; Martin, J.; Velankar, S. S.; Lee, A. S.; Badylak, S. F., Preparation and rheological characterization of a gel form of the porcine urinary bladder matrix. *Biomaterials* **2008**, *29* (11), 1630-7. DOI: 10.1016/j.biomaterials.2007.12.014.
